# Supplementary material
Source: PubMed Central journal article supplement (PMC5047042)
Supplement: supp_WNL.0000000000003147_aap-cns_pediatric_neurology_survey_2015.pdf [file supp_WNL.0000000000003147_aap-cns_pediatric_neurology_survey_2015.pdf]

## 2015 AAP Workforce Survey: Section on Neurology--Child Neurology Society

This survey asks for information about your career and educational and training issues. The survey is organized into a general section, which is asked of all pediatricians, and a section which is specific to your subspecialty or AAP section.

Please answer all of the questions to the best of your ability. Please consult records concerning number of patients seen, procedures performed, and so forth. For the purposes of this survey, "specialty" refers to your initial training (i.e., the specialty in which you completed your residency training). A "pediatric subspecialist" is a physician who treats children, either through training in a pediatric medical subspecialty or surgical specialty, or through training in an adult specialty AND pediatrics. As an example, if you are a pediatric otolaryngologist, then your specialty training might be internal medicine and your subspecialty could be adult otolaryngology, with a second subspecialty in pediatric otolaryngology.

Please direct questions or concerns about this survey to Holly Ruch-Ross, ScD, research and evaluation consultant, at [hruchross@aol.com](mailto:hruchross@aol.com).

## 2015 AAP Workforce Survey: Section on Neurology--Child Neurology Society

This section of the survey asks for specific information about your specialty training and certification.

1. What is your professional degree?

- M.D.
- D.O.
- Other degree (please specify below)

Other (please specify)

## 2015 AAP Workforce Survey: Section on Neurology--Child Neurology Society

2. What is the primary, or first, specialty or subspecialty in which you have been trained?

For example, if you are a neonatologist, then your specialty training would be pediatrics with a subspecialty in neonatology. You would enter "pediatrics" here, and you will be able to enter "neonatology" on a subsequent question.

Please enter only one response; you will be asked about additional specialties later.

## 2015 AAP Workforce Survey: Section on Neurology--Child Neurology Society

3. In what YEAR did you complete your training in [Q2]?

4. Are you board certified in [Q2]?

Yes

No

5. Did you train in an additional specialty/subspecialty?

Yes

No

## 2015 AAP Workforce Survey: Section on Neurology--Child Neurology Society

6. What is the second specialty or subspecialty in which you have been trained? Please enter only one response; you will be asked about additional specialties later.

## 2015 AAP Workforce Survey: Section on Neurology--Child Neurology Society

7. In what YEAR did you complete your training in [Q6]?

8. Are you board certified in [Q6]?

Yes

No

9. Did you train in an additional specialty/subspecialty?

Yes

No

**2015 AAP Workforce Survey: Section on Neurology--Child Neurology Society**

10. What is the third specialty or subspecialty in which you have been trained? Please enter only one response.

**2015 AAP Workforce Survey: Section on Neurology--Child Neurology Society**

11. In what YEAR did you complete your training in [Q10]?

12. Are you board certified in [Q10]?

Yes

No

13. Please list any additional specialties or subspecialties in which you have been trained.

Specialty/Subspecialty

Specialty/Subspecialty

Specialty/Subspecialty

Specialty/Subspecialty

**2015 AAP Workforce Survey: Section on Neurology--Child Neurology Society**

14. Are you enrolled in Maintenance of Certification? Please check all that apply.

- No, I have lifetime certification
- No, my initial certification is still current
- No, my certification has lapsed
- Yes, in my primary specialty/subspecialty: [Q2]
- Yes, in my second specialty/subspecialty: [Q6]
- Yes, in my third specialty/subspecialty: [Q10]
- Yes, in another specialty or subspecialty
- Other (please explain below)

Other (please explain)

## 2015 AAP Workforce Survey: Section on Neurology--Child Neurology Society

15. Please indicate your main employment site, that is, the setting in which you spend the most time.

- Solo practice
- Pediatric group practice
- Specialty group practice
- Multi-specialty group
- HMO staff/group model
- Non-profit community health center or health dept
- Uniform Health Services clinic
- Medical school/hospital (or parent university)
- Community/staff model hospital
- Other (please specify below)

Other (please specify)

16. Are you a hospitalist?

- Yes
- No

17. What is the zip code of your main employment site?

U.S. zip code (5 digits)

Canadian zip code

Other

18. How would you describe the community type of your main employment site?

- Urban, inner city
- Urban, not inner city
- Suburban
- Rural

19. During a typical work week, what is the total number of hours you usually work?

Hours worked

20. During a typical work week, what percent of your time do you spend in the following professional activities? If you do not spend any time in a particular activity, please indicate zero (0) in the appropriate space. Note that your responses should total 100.

As a resident or fellow in training - %

Direct patient care (include time spent on patient-related record keeping and other office work) - %

Administration (include activities related to planning/managing services in hospitals or other health facilities) - %

Teaching - %

Clinical research - %

Basic science research - %

Health services research - %

Other medical activities not involving the direct care of patients (e.g., committee work, consulting with agencies) - %

Other - %

21. Do you provide direct patient care?

Yes

No

22. What proportion of your direct patient care time is spent in primary care pediatrics and in subspecialty care?

Please note that responses should total 100.

primary care pediatrics - %

pediatric medical subspecialty (specify area below) - %

pediatric surgical specialty (specify area below) - %

another specialty, including adult (specify area below) - %

23. Please specify specialty areas in which you provide direct patient care.

Pediatric medical subspecialty

Pediatric surgical specialty

Another specialty (including adult)

Other

24. Do you receive referrals for pediatric patients?

Yes

No

25. From which sources do you receive referrals? Please check all that apply.

- Pediatric generalists
- Family physicians
- General internists
- Obstetric/Gynecologists
- Adult medicine subspecialists
- Pediatric medical subspecialists/surgical specialists
- Pediatric nurse practitioners
- Non-pediatric nurse practitioners
- Physician assistants
- Others (please specify below)

Other (please specify)

26. Do you receive referrals from any of the following sites? Please check all that apply.

- Urgent care centers
- Community agencies
- School districts
- None of these sites

27. Do your pediatric referrals come from only within your own practice or managed care network?

- Yes
- No
- No, not in a network

28. Has the volume or complexity of pediatric referrals that you have received in the last 12 months changed compared to previously?

- Yes
- No, neither has changed



29. What has changed in the last 12 months?

|                                          | Increased             | Decreased             | Not changed           |
|------------------------------------------|-----------------------|-----------------------|-----------------------|
| Volume of referrals has.....             | <input type="radio"/> | <input type="radio"/> | <input type="radio"/> |
| Complexity of referred patients has..... | <input type="radio"/> | <input type="radio"/> | <input type="radio"/> |

30. To what do you attribute the change in referrals in the last 12 months? Please indicate below which and how conditions have changed in your area. Please check one for each response.

|                                                                                                                | Increased             | Decreased             | Not changed           |
|----------------------------------------------------------------------------------------------------------------|-----------------------|-----------------------|-----------------------|
| Likelihood of general pediatricians and other generalists to treat LESS complex subspecialty patients has..... | <input type="radio"/> | <input type="radio"/> | <input type="radio"/> |
| Likelihood of general pediatricians and other generalists to treat MORE complex subspecialty patients has..... | <input type="radio"/> | <input type="radio"/> | <input type="radio"/> |
| The amount of competition with other pediatric subspecialists has.....                                         | <input type="radio"/> | <input type="radio"/> | <input type="radio"/> |
| The amount of referrals from adult subspecialists to me has.....                                               | <input type="radio"/> | <input type="radio"/> | <input type="radio"/> |
| The number of inappropriate or questionable referrals has.....                                                 | <input type="radio"/> | <input type="radio"/> | <input type="radio"/> |
| The incidence or severity of illnesses/conditions in my community that I treat has.....                        | <input type="radio"/> | <input type="radio"/> | <input type="radio"/> |
| Other (please specify below).....                                                                              | <input type="radio"/> | <input type="radio"/> | <input type="radio"/> |

Other (please specify)

**2015 AAP Workforce Survey: Section on Neurology--Child Neurology Society**

31. Do you face competition for your pediatric subspecialty services in your geographical area?

- Yes
- No

**2015 AAP Workforce Survey: Section on Neurology--Child Neurology Society**

32. From whom do you face competition for your pediatric subspecialty services? Please check all that apply.

- General pediatricians
- Family physicians
- Other pediatric medical subspecialists/surgical specialists
- Physicians trained in adult medicine in my subspecialty
- Non-physician medical personnel (e.g., advanced practice nurses, chiropractors)
- Related health personnel (e.g., psychologists, nutritionists)
- Urgent care center
- Retail based clinic(s)
- Others (please specify below)

Other (please specify)

33. Have you modified your practice as a result of competition with others?

- Yes
- No

34. How have you modified your practice as a result of competition with others?

|                                                       | Increased             | Decreased             | No change             |
|-------------------------------------------------------|-----------------------|-----------------------|-----------------------|
| Office hours                                          | <input type="radio"/> | <input type="radio"/> | <input type="radio"/> |
| Fees                                                  | <input type="radio"/> | <input type="radio"/> | <input type="radio"/> |
| Number of support staff and/or their responsibilities | <input type="radio"/> | <input type="radio"/> | <input type="radio"/> |
| Number of advanced practice nurses employed           | <input type="radio"/> | <input type="radio"/> | <input type="radio"/> |
| Number of physician assistants employed               | <input type="radio"/> | <input type="radio"/> | <input type="radio"/> |
| Number of physicians for practice                     | <input type="radio"/> | <input type="radio"/> | <input type="radio"/> |
| Amount of research/administrative activities          | <input type="radio"/> | <input type="radio"/> | <input type="radio"/> |
| Other (please specify below)                          | <input type="radio"/> | <input type="radio"/> | <input type="radio"/> |

Other (please specify)

**2015 AAP Workforce Survey: Section on Neurology--Child Neurology Society**

35. What is the typical waiting time for a non-emergency appointment for a new patient in your principal practice site?

- Same day
- 1-2 days
- 3-7 days
- 8-14 days
- 15 days-4 weeks
- More than 4 weeks to 8 weeks
- More than 8 weeks to 16 weeks
- More than 16 weeks

36. Have you used telemedicine/telehealth as a part of consultation with another physician or non-physician clinician? Please check all that apply.

- Yes, for convenience
- Yes, for a group consult
- Yes, to obtain a second or expert opinion
- Yes, to provide expert opinion
- Yes, for patient(s) in a rural area
- Yes, due to unacceptable wait times
- No

If yes, please specify the types of physicians or non-physician clinicians involved, and the format of the consultation.

37. Have you ever taken an extended leave of absence or sabbatical from the clinical practice of medicine?

- Yes
- No

## 2015 AAP Workforce Survey: Section on Neurology--Child Neurology Society

38. How long were you away from medicine when you took your extended leave?

- Less than 2 years
- 2-5 years
- 6-10 years
- More than 10 years

Please feel free to share any comments you have about your leave.

39. Did you engage in any of the following activities to prepare yourself for your return to clinical practice?  
Please check all that apply.

- I have not returned to clinical practice
- Assessment/evaluation program
- Continuing medical education (CME) courses
- Mentoring by or shadowing another physician(s)
- Volunteer activities
- Formal physician reentry program or mini-residency
- Other (please specify below)

Other (please specify)

**2015 AAP Workforce Survey: Section on Neurology--Child Neurology Society**

40. Are you a member of any of these organizations? Please check all that apply.

- American Academy of Pediatrics (AAP)
- AAP Section on Pediatric Neurology (SONu)
- American Academy of Neurology (AAN)
- American Neurological Association (ANA)
- Child Neurology Society (CNS)
- Society for Pediatric Research (SPR)
- International Child Neurology Association (ICNA)
- Other

Other (please specify)

**2015 AAP Workforce Survey: Section on Neurology--Child Neurology Society**

41. Are you currently practicing (clinically or otherwise) in the capacity of a pediatric neurologist?

- Yes.
- Yes, but I am presently on leave.
- I have been trained as a pediatric neurologist, but my primary clinical work is as an adult neurologist.
- No.
- Other (please specify below)

Other (please specify)

**2015 AAP Workforce Survey: Section on Neurology--Child Neurology Society**

42. In what capacity do you function as a pediatric neurology professional? Please indicate the percentage of time devoted to each activity. Responses should total 100%.

Independent/private solo clinical practice

Independent/private clinical practice with more than one pediatric neurologist

Independent/private multi-specialty practice

Independent faculty practice

Hospitalist

Ambulatory/outpatient clinical neurology for a hospital system, with some inpatient consultative or admitting responsibilities

Medical school teaching faculty (paid position)

Medical school teaching faculty (unpaid voluntary or adjunct)

Administrator or Medical Director/Chief Medical Officer: hospital-based system

Administrator or Medical Director/Chief Medical Officer: non-hospital based system

Military physician

Pharmaceutical or biomedical company

Telemedicine

Forensic consultant

Pharmaceutical/biomedical industry consultant

Other industry consultant

Insurance company

State government employee

Federal government employee

43. In what capacity do you function as a pediatric neurology professional? Please indicate the approximate percentage of time devoted to each activity.

|                                                                                                                                | None                  | <10%                  | 10-49%                | 50-99%                | 100%                  |
|--------------------------------------------------------------------------------------------------------------------------------|-----------------------|-----------------------|-----------------------|-----------------------|-----------------------|
| Independent/private solo clinical practice                                                                                     | <input type="radio"/> |
| Independent/private clinical practice with more than one pediatric neurologist                                                 | <input type="radio"/> |
| Independent/private multi-specialty practice                                                                                   | <input type="radio"/> |
| Independent faculty practice                                                                                                   | <input type="radio"/> |
| Hospitalist                                                                                                                    | <input type="radio"/> |
| Ambulatory/outpatient clinical neurology for a hospital system, with some inpatient consultative or admitting responsibilities | <input type="radio"/> |
| Medical school teaching faculty (paid position)                                                                                | <input type="radio"/> |
| Medical school teaching faculty (unpaid voluntary or adjunct)                                                                  | <input type="radio"/> |
| Administrator or Medical Director/Chief Medical Officer: hospital-based system                                                 | <input type="radio"/> |
| Administrator or Medical Director/Chief Medical Officer: non-hospital based system                                             | <input type="radio"/> |
| Military physician                                                                                                             | <input type="radio"/> |
| Pharmaceutical or biomedical company                                                                                           | <input type="radio"/> |
| Telemedicine                                                                                                                   | <input type="radio"/> |
| Forensic consultant                                                                                                            | <input type="radio"/> |
| Pharmaceutical/biomedical industry consultant                                                                                  | <input type="radio"/> |
| Other industry consultant                                                                                                      | <input type="radio"/> |
| Insurance company                                                                                                              | <input type="radio"/> |
| State government employee                                                                                                      | <input type="radio"/> |
| Federal government employee                                                                                                    | <input type="radio"/> |



44. Which of the following activities are involved in your work? Please check all that apply.

- General pediatric neurology
- Administration (including chief/chair responsibilities)
- Teaching
- Collaboration/supervision for Advance Practice Nurses/Physician Assistants
- None of these

45. Are you engaged in any of the following activities as a part of your work? Please check all that apply.

- Pediatric neurology subspecialty (please specify below)
- General pediatrics
- Clinical research
- Translational research
- Basic science research
- No, I am not engaged in any of these activities

Please specify pediatric neurology subspecialty

**2015 AAP Workforce Survey: Section on Neurology--Child Neurology Society**

46. Please indicate your sources of funding in percentages. All percentages should total 100.

|                                                         |                      |
|---------------------------------------------------------|----------------------|
| Federal government                                      | <input type="text"/> |
| State government                                        | <input type="text"/> |
| Private philanthropic foundation                        | <input type="text"/> |
| Nonprofit organization                                  | <input type="text"/> |
| Other (including clinical revenue and internal funding) | <input type="text"/> |

**2015 AAP Workforce Survey: Section on Neurology--Child Neurology Society**

47. What percentage of your effort, if any, is covered by external funding, such as the National Institutes of Health (NIH), the Centers for Disease Control and Prevention (CDC), the National Science Foundation (NSF), the US Department of Defense (DOD), foundations, and/or philanthropy?

- 0%
- 1-20%
- 21-40%
- 41-60%
- 61-80%
- 81-100%

**2015 AAP Workforce Survey: Section on Neurology--Child Neurology Society**

48. Including yourself, how many pediatric neurologists are in your practice?

- 1-2
- 3-5
- 6-8
- 9-11
- 12-15
- 16-19
- 20 +

If more than 20, please specify # here:

49. Are you a Pediatric Neurology Division Director/Chief?

- Yes
- No

**2015 AAP Workforce Survey: Section on Neurology--Child Neurology Society**

50. How many of the physicians in your division have external research funding from the following sources?

|                                     | 0                     | 1-2                   | 3-5                   | 6-10                  | 11+                   |
|-------------------------------------|-----------------------|-----------------------|-----------------------|-----------------------|-----------------------|
| NIH                                 | <input type="radio"/> |
| CDC                                 | <input type="radio"/> |
| Department of Defense               | <input type="radio"/> |
| NSF                                 | <input type="radio"/> |
| Other federal government            | <input type="radio"/> |
| State funding                       | <input type="radio"/> |
| Foundations/nonprofit organizations | <input type="radio"/> |
| Philanthropic                       | <input type="radio"/> |

51. Please indicate how many of the following professionals are in your practice setting:

|                                            | 0                     | 1-2                   | 3-5                   | 6-10                  | >10                   |
|--------------------------------------------|-----------------------|-----------------------|-----------------------|-----------------------|-----------------------|
| Nurse practitioners                        | <input type="radio"/> |
| Physician assistants                       | <input type="radio"/> |
| Registered nurses                          | <input type="radio"/> |
| Social workers                             | <input type="radio"/> |
| Neuropsychologists                         | <input type="radio"/> |
| Psychologists                              | <input type="radio"/> |
| Occupational therapists                    | <input type="radio"/> |
| Speech therapists                          | <input type="radio"/> |
| Physical therapists                        | <input type="radio"/> |
| Neurotechnologists (EEG technicians, etc.) | <input type="radio"/> |
| Other                                      | <input type="radio"/> |

Other (please specify)

52. In your opinion, is your current level of physician staffing:

- Excessive
- Adequate
- Insufficient

53. In your opinion, is your current level of nonphysician clinician staffing:

- Excessive
- Adequate
- Insufficient

**2015 AAP Workforce Survey: Section on Neurology--Child Neurology Society**

54. In the next three years, how many pediatric neurologists do you expect your practice to hire?

|                                                              | 0                     | 1-2                   | 3-5                   | 6-8                   | >8                    |
|--------------------------------------------------------------|-----------------------|-----------------------|-----------------------|-----------------------|-----------------------|
| New positions                                                | <input type="radio"/> |
| Replacements for departing neurologists (including retirees) | <input type="radio"/> |

55. Does your practice currently have a position(s) available for a pediatric neurologist?

- Yes
- No

**2015 AAP Workforce Survey: Section on Neurology--Child Neurology Society**

56. How many positions are currently available?

Number of positions available:

57. How many of the available positions are:

Primarily clinical (≥80% effort):

Primarily research (≥80% effort):

Blended clinical/research:

**2015 AAP Workforce Survey: Section on Neurology--Child Neurology Society**

58. How many pediatric neurology residents are in your department/division/practice? (This typically includes PGY3-5, not including residents in the pediatric sections of 5-year categorical programs.)

- 0 (no active residency program)
- 1-3
- 4-6
- 7+

59. How many pediatric neurology subspecialty fellows are in your department/division/practice? (Typically, this includes PGY 6 and above, not including trainees from adult neurology fellowships who rotate through pediatric neurology services.)

- 0 (no active fellowship programs)
- 1-3
- 4-6
- 7+

60. In your current patient mix, approximately what proportion has each of the following categories of disorders?

|                                                                                        | Outpatient           | Inpatient            |
|----------------------------------------------------------------------------------------|----------------------|----------------------|
| Headaches/migraine                                                                     | <input type="text"/> | <input type="text"/> |
| Seizures/epilepsy                                                                      | <input type="text"/> | <input type="text"/> |
| Movement disorders (including tics/Tourette)                                           | <input type="text"/> | <input type="text"/> |
| Neurodevelopmental and intellectual disabilities (including Autism Spectrum Disorders) | <input type="text"/> | <input type="text"/> |
| Neuropsychiatric/neurobehavioral and learning disorders (including ADHD)               | <input type="text"/> | <input type="text"/> |
| Neuromuscular disorders                                                                | <input type="text"/> | <input type="text"/> |
| Neuroimmunology (including MS and ADEM)                                                | <input type="text"/> | <input type="text"/> |
| Metabolic disorders                                                                    | <input type="text"/> | <input type="text"/> |
| Neurogenetic disorders (non-neuromuscular)                                             | <input type="text"/> | <input type="text"/> |
| Neuro-oncology                                                                         | <input type="text"/> | <input type="text"/> |
| Brain injury (including sports concussion)                                             | <input type="text"/> | <input type="text"/> |
| Fetal/neonatal neurology                                                               | <input type="text"/> | <input type="text"/> |
| Sleep disorders                                                                        | <input type="text"/> | <input type="text"/> |
| Other (please specify below)                                                           | <input type="text"/> | <input type="text"/> |

Other (please specify)

61. How many half day clinics do you work each week?

- none
- 1-2
- 3-5
- 6-8
- 9-10

62. On average, how many weekends are you on call annually?

- none
- 1-5
- 6-10
- 11-15
- 16-20
- 21-25
- 26+

**2015 AAP Workforce Survey: Section on Neurology--Child Neurology Society**

63. Do you plan to fully retire in the next five years?

- Yes
- No
- Not sure

**2015 AAP Workforce Survey: Section on Neurology--Child Neurology Society**

64. Do you plan to do any of the the following in the next five years? Please check all that apply.

|                                                   | Yes                   | No                    | Not sure              |
|---------------------------------------------------|-----------------------|-----------------------|-----------------------|
| Significantly reduce my clinical responsibilities | <input type="radio"/> | <input type="radio"/> | <input type="radio"/> |
| Significantly reduce my research responsibilities | <input type="radio"/> | <input type="radio"/> | <input type="radio"/> |
| Significantly reduce my administrative activities | <input type="radio"/> | <input type="radio"/> | <input type="radio"/> |

65. Do you plan to stop taking care of pediatric neurology patients in the next five years?

- Yes
- No
- Not sure

**2015 AAP Workforce Survey: Section on Neurology--Child Neurology Society**

66. What do you plan to do when you stop taking care of pediatric neurology patients? Please check all that apply.

- Take an administrative role in a hospital or medical school
- Take another administrative role (please specify below)
- Work in industry
- Work for the federal government
- Work for state government
- Provide clinical care to non-neurology patients
- Work in a career outside of medicine
- Other (please specify)

Other (please specify another choice, or add comments you have about your plans):

**2015 AAP Workforce Survey: Section on Neurology--Child Neurology Society**

67. What are the primary reasons that you no longer take care of pediatric neurology patients? Please check all that apply.

- I am fully or semi-retired
- Financial considerations
- Could not find suitable pediatric neurology position
- Prefer nonclinical position
- Prefer to work as a general pediatrician
- Prefer to work in another specialty (please specify below)
- Prefer industry
- Prefer governmental job
- Family responsibilities
- Other

Other (please specify):

68. Do you have any plans to return to the practice of pediatric neurology in the future?

- Yes, within a few years
- Yes, at some point in the future
- No



**2015 AAP Workforce Survey: Section on Neurology--Child Neurology Society**

69. If you had it to do over, and knowing what you know now, would you choose pediatric neurology or neurodevelopmental disabilities as your subspecialty today?

- Definitely
- Probably
- Maybe
- Probably not
- Definitely not

**2015 AAP Workforce Survey: Section on Neurology--Child Neurology Society**

70. Please explain why you might not choose pediatric neurology or neurodevelopmental disabilities again.

**2015 AAP Workforce Survey: Section on Neurology--Child Neurology Society**

71. In thinking about the positive and negative aspects of pediatric neurology as a subspecialty, how would you rate each of the following factors?

|                                                            | Extremely positive    | Positive              | Neutral               | Negative              | Extremely negative    | N/A                   |
|------------------------------------------------------------|-----------------------|-----------------------|-----------------------|-----------------------|-----------------------|-----------------------|
| Hours worked                                               | <input type="radio"/> |
| Intellectual challenge                                     | <input type="radio"/> |
| Compensation                                               | <input type="radio"/> |
| Academic setting                                           | <input type="radio"/> |
| Opportunity/requirement to teach                           | <input type="radio"/> |
| Research opportunities                                     | <input type="radio"/> |
| Administrative tasks and requirements                      | <input type="radio"/> |
| Professional satisfaction                                  | <input type="radio"/> |
| Patient population                                         | <input type="radio"/> |
| Flexible work schedules                                    | <input type="radio"/> |
| Ability to provide lifespan services (pediatric and adult) | <input type="radio"/> |
| Varied professional and practice opportunities             | <input type="radio"/> |
| Industry opportunities                                     | <input type="radio"/> |
| Work-life balance                                          | <input type="radio"/> |

72. Child neurology training positions continue to fill at lower rates than most other specialties in the National Resident Matching Program (NRMP). In your opinion, what are the primary reasons for this? Please drag and drop into a rank-order list (1 = most important reason).

|                      |                                                                             |
|----------------------|-----------------------------------------------------------------------------|
| <input type="text"/> | Insufficient exposure in college and medical school                         |
| <input type="text"/> | Students interested in pediatrics are generally not interested in neurology |
| <input type="text"/> | Students interested in neurology are generally not interested in children   |
| <input type="text"/> | Length of training                                                          |
| <input type="text"/> | The requirement for adult neurology training                                |
| <input type="text"/> | Perceived intellectual difficulty of the specialty                          |
| <input type="text"/> | Lower income compared to other specialties                                  |

73. In your opinion, what clinical areas should receive more emphasis in child neurology training in the future? Please check all that apply.

- Headaches/migraine
- Seizures/epilepsy
- Movement disorders (including tics/Tourette)
- Neurodevelopmental and intellectual disabilities (including Autism Spectrum Disorders)
- Neuropsychiatric/neurobehavioral and learning disorders (including ADHD)
- Neuromuscular disorders
- Neuroimmunology (including MS and ADEM)
- Metabolic disorders
- Neurogenetic disorders (non-neuromuscular)
- Neuro-oncology
- Brain injury (including sports concussion)
- Fetal/neonatal neurology
- Sleep disorders
- Other (please specify)

Other (please specify):

74. Should any of the following alternative training options be established for board routine eligibility in pediatric neurology?

|                                                                                                                | Should be an option   | Should NOT be an option |
|----------------------------------------------------------------------------------------------------------------|-----------------------|-------------------------|
| 5 years of training with fewer months of adult neurology                                                       | <input type="radio"/> | <input type="radio"/>   |
| 4 years of training (1 year of general pediatrics and 3 years of neurology)                                    | <input type="radio"/> | <input type="radio"/>   |
| 4 years of training (1 year of general pediatrics and 3 years of neurology, with fewer adult neurology months) | <input type="radio"/> | <input type="radio"/>   |

Other suggestion:

75. Was neurology a required clerkship in your medical school?

- Yes
- No

### 2015 AAP Workforce Survey: Section on Neurology--Child Neurology Society

76. What year of medical school was your required neurology clerkship?

- 3rd year
- 4th year
- Other

Other (please specify)

77. Was child neurology a component of your medical school neurology clerkship?

- Yes
- No

### 2015 AAP Workforce Survey: Section on Neurology--Child Neurology Society

78. During your career, at how many distinct institutions/practices/organizations have you worked as a pediatric neurologist since completing training?

- 1
- 2-3
- 4-5
- 6 or more

**2015 AAP Workforce Survey: Section on Neurology--Child Neurology Society**

79. Which of the following resources did you use to pay for medical school? Please check all that apply.

| Type of resource                                                      | Percent contribution |
|-----------------------------------------------------------------------|----------------------|
| Bank or other loans                                                   | <input type="text"/> |
| Public Health Service Corps/National Health Service Corps scholarship | <input type="text"/> |
| Other scholarship                                                     | <input type="text"/> |
| Personal or family funds                                              | <input type="text"/> |
| Military                                                              | <input type="text"/> |
| Other forms of support (please specify below)                         | <input type="text"/> |

Other (please specify)

80. If you took out a bank or other loan, what was the total amount financed?

- I did not take out a bank or other loan.
- <\$50,000
- \$51,000 to \$100,000
- \$101,000 to \$150,000
- \$151,000 to \$200,000
- \$201,000 to \$250,000
- \$251,000 to \$300,000
- \$301,000 to \$400,000
- > \$400,000

## 2015 AAP Workforce Survey: Section on Neurology--Child Neurology Society

81. How many years did it take you to pay off the debt?

I have paid off my loans, and it took me:

I have not paid off my loans, and it will take me:

Years to pay

82. Please estimate the percent of your income received from each of the following entities. Enter "0" if you do not work for a specific type of entity.

Hospital/medical center (% income received)

Medical school

Hospital or medical school independent physician group

Sole proprietorship LLC, owner

Sole proprietorship LLC, employee

Group practice, LLC or corporation, voting shareholder

Group practice, LLC or corporation, non-voting shareholder

Group practice, LLC or corporation, employee, non-shareholder

Government agency

Military

Industry

Other

83. How do you derive your income from professional pursuits as a physician? Please estimate the percent of your income which comes from the following sources. If you derive no income from a particular source, please enter "0".

Hospital paycheck

Medical school paycheck

Hospital or medical school physician group paycheck

Government paycheck

Paycheck from private practice independent group, non-partner

Paycheck from private practice/independent practice group, equity partner or shareholder

Income derived from legal/forensic consultation/work

Income derived from industry consultation/work

Other

84. For the portions of your professional income obtained from an employer, what form of accountability is utilized? Please check all that apply.

- Work Relative Value Units (WRVUs)
- Cash basis (i.e., the amount of cash collections [not charges] that are credited to your work)
- Other formulas of accountability (please describe below)
- I am not held to any financial accountability by any employer that employs me.

Other (please specify)

85. What does your compensation consist of? Please provide percent of compensation for each, and indicate if guaranteed or not guaranteed/variable/contingent.

|                                                                     | Percent              | Guaranteed/not guaranteed |
|---------------------------------------------------------------------|----------------------|---------------------------|
| Base salary                                                         | <input type="text"/> | <input type="text"/>      |
| Bonus                                                               | <input type="text"/> | <input type="text"/>      |
| Percent of total revenues collected by me                           | <input type="text"/> | <input type="text"/>      |
| Percent of total revenues collected by the entire group or division | <input type="text"/> | <input type="text"/>      |
| Shares or options                                                   | <input type="text"/> | <input type="text"/>      |
| Deferred compensation                                               | <input type="text"/> | <input type="text"/>      |
| Other (describe below)                                              | <input type="text"/> | <input type="text"/>      |

Other (please specify)



86. What does your benefit package consist of? Please choose all that apply.

- Medical insurance for me only
- Medical insurance for me and my family
- 401K
- Loan repayment program for me (undergraduate or medical school educational debt)
- Tuition reimbursement for professional education after medical school for me
- Tuition reimbursement for my children
- Dental insurance
- Flexible Spending Account
- Reimbursement of all licensures and liability insurances
- Reimbursement for professional dues
- Reimbursement for professional meetings/conferences, including live and other CME activities
- Disability insurance
- Company car or mileage reimbursement
- Other benefits (describe below)

Other (please specify)

87. Please select the statement that most closely aligns with your beliefs regarding your compensation.

- I am compensated fairly and the accountability for my compensation is appropriate.
- I am compensated fairly but I am opposed to how accountability is measured.
- I am compensated unfairly but accountability is appropriate.
- I am compensated unfairly and accountability is inappropriate.
- Other (describe below)

Other (please specify)

88. Please explain why you stay in your present position even though you feel you are unfairly compensated. Please also note if your current compensation has influenced your long-term plans for staying in that position.

89. In your opinion, in the future the compensation of child neurologists will:

- Decrease significantly
- Decrease moderately
- Stay the same
- Increase moderately
- Increase significantly

90. Please choose the response that best matches your thoughts regarding the following statements:

|                                                                               | Strongly agree        | Agree                 | Neutral               | Disagree              | Strongly disagree     |
|-------------------------------------------------------------------------------|-----------------------|-----------------------|-----------------------|-----------------------|-----------------------|
| Child neurology is a professionally satisfying career.                        | <input type="radio"/> |
| Child neurology offers superior compensation.                                 | <input type="radio"/> |
| Child neurology offers opportunities to maintain a healthy work/life balance. | <input type="radio"/> |

**2015 AAP Workforce Survey: Section on Neurology--Child Neurology Society**

91. Do you manage patients with epilepsy?

- Yes
- No

**2015 AAP Workforce Survey: Section on Neurology--Child Neurology Society**

92. Do you read EEGs?

Yes

No

**2015 AAP Workforce Survey: Section on Neurology--Child Neurology Society**

93. How were you trained to read EEGs?

Residency in neurology

Residency in pediatric neurology

Fellowship in clinical neurophysiology/EEG/epilepsy

Other

Other (please specify)

94. Do you have an epilepsy specialist in your group/at your institution?

Yes

No

**2015 AAP Workforce Survey: Section on Neurology--Child Neurology Society**

95. Do you refer children with epilepsy to a specialty epilepsy center?

Yes

No

**2015 AAP Workforce Survey: Section on Neurology--Child Neurology Society**

96. How far away from your group/institution is the specialty epilepsy center to which you refer?

- 0-10 miles
- 11-20 miles
- 21-40 miles
- 41-60 miles
- > 60 miles

97. What is the current wait time for patients to see the specialist?

- 1 month or less
- 2 to 6 months
- More than 6 months

98. How many APRNs work collaboratively with child neurologists in epilepsy specialty care at your institution?

- 0
- 1-3
- 4-6
- 7-9
- 10+

99. Do you use telemedicine services to care for children with epilepsy?

- Yes
- No

100. For these telemedicine services, are you personally the epilepsy provider, or do you consult with an epilepsy specialist?

- I am the epilepsy provider.
- I consult with an epilepsy specialist.
- Other

Other (please specify)

**2015 AAP Workforce Survey: Section on Neurology--Child Neurology Society**

101. Would you ever consider using telemedicine to care for children with epilepsy?

- Yes
- No

102. How confident are you in your ability to do each of the following?

|                                                                                                                                                                                                                                 | Not at all confident  | Not so confident      | Confident             | Very confident        |
|---------------------------------------------------------------------------------------------------------------------------------------------------------------------------------------------------------------------------------|-----------------------|-----------------------|-----------------------|-----------------------|
| Educate and motivate children and youth with epilepsy to comply with their action plan.                                                                                                                                         | <input type="radio"/> | <input type="radio"/> | <input type="radio"/> | <input type="radio"/> |
| Communicate with children and youth with epilepsy about transition and related issues (e.g., taking on medication responsibilities, asking questions of healthcare professionals, seeing doctors who specialize in adult care). | <input type="radio"/> | <input type="radio"/> | <input type="radio"/> | <input type="radio"/> |
| Communicate with families and caregivers about epilepsy in children and youth, including safety, sports, moods, contraception.                                                                                                  | <input type="radio"/> | <input type="radio"/> | <input type="radio"/> | <input type="radio"/> |

103. How knowledgeable are you about each of the following?

|                                                                                          | Not at all knowledgeable | Not very knowledgeable | Knowledgeable         | Very knowledgeable    |
|------------------------------------------------------------------------------------------|--------------------------|------------------------|-----------------------|-----------------------|
| Pharmacological management of epilepsy in children and youth.                            | <input type="radio"/>    | <input type="radio"/>  | <input type="radio"/> | <input type="radio"/> |
| The treatment of mental and emotional health issues in children and youth with epilepsy. | <input type="radio"/>    | <input type="radio"/>  | <input type="radio"/> | <input type="radio"/> |

104. Of the children and youth with epilepsy in your practice:

|                                                                                                                        | Very few<br>(<10%)    | Some (10-<br>49%)     | Most (50-89%)         | Almost all<br>(>90%)  | All (100%)            |
|------------------------------------------------------------------------------------------------------------------------|-----------------------|-----------------------|-----------------------|-----------------------|-----------------------|
| How many have an epilepsy action plan or care coordination plan?                                                       | <input type="radio"/> |
| For how many have you shared an epilepsy action plan or care coordination plan with their school or childcare setting? | <input type="radio"/> |
| For how many do you have access to the information you need to care for them?                                          | <input type="radio"/> |

105. After appointments with children and youth with epilepsy, how often do you share visit findings and an epilepsy action plan or care coordination plan with the child's primary care provider?

- Rarely
- Sometimes
- Most of the time
- Almost always
- Always
- Other

Other (please specify)

106. If the opportunity to be trained in pediatric seizure management (virtually) were offered to you free of charge, how likely would you be to participate for 1 hour a week for a 6- to 12-month period?

| Very unlikely         | Unlikely              | Neither likely nor unlikely | Likely                | Very likely           |
|-----------------------|-----------------------|-----------------------------|-----------------------|-----------------------|
| <input type="radio"/> | <input type="radio"/> | <input type="radio"/>       | <input type="radio"/> | <input type="radio"/> |

## 2015 AAP Workforce Survey: Section on Neurology--Child Neurology Society

**You are almost finished! Please take one more moment to answer a few questions about yourself.**

107. What is your sex?

- Male
- Female

108. Are you of Hispanic, Latino or Spanish origin?

Yes

No

109. What is your race? Please check all that apply.

Asian

Native Hawaiian or Other Pacific Islander

Black/African American

American Indian or Alaska Native

White

Other

110. In what year did you graduate from medical school?

111. What is the location of your medical school?

U.S.

Canada

Other

112. Is there anything else you would like to tell us about your practice of pediatric neurology?

**2015 AAP Workforce Survey: Section on Neurology--Child Neurology Society**

**Thank you for participating in the AAP 2015 Workforce Survey. We appreciate your time!**
